# Supplementary material
Source: Springer Nature journal article supplement (https://www.springermedizin.de/resource/supplementary/12875_2012_738_MOESM1_ESM.pdf/9435258)
Supplement: MOESM1 [file 9435258]

1661 publications identified

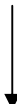

722 excluded based on title/abstract screening

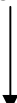

939 full text obtained

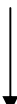

145 excluded

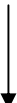

794 publications included
